# Supplementary material for: Confirmation of the pleiotropic control of leaflet shape and number of seeds per pod by the Ln gene in induced soybean mutants
Source: PubMed Central journal article supplement — Breed Sci. 2017 Jul 28;67(4):363–9. doi: 10.1270/jsbbs.16201 (PMC5654458; doi:10.1270/jsbbs.16201), 2017-07-28
Supplement: 67_16201_1.pdf [file 67_16201_1.pdf]

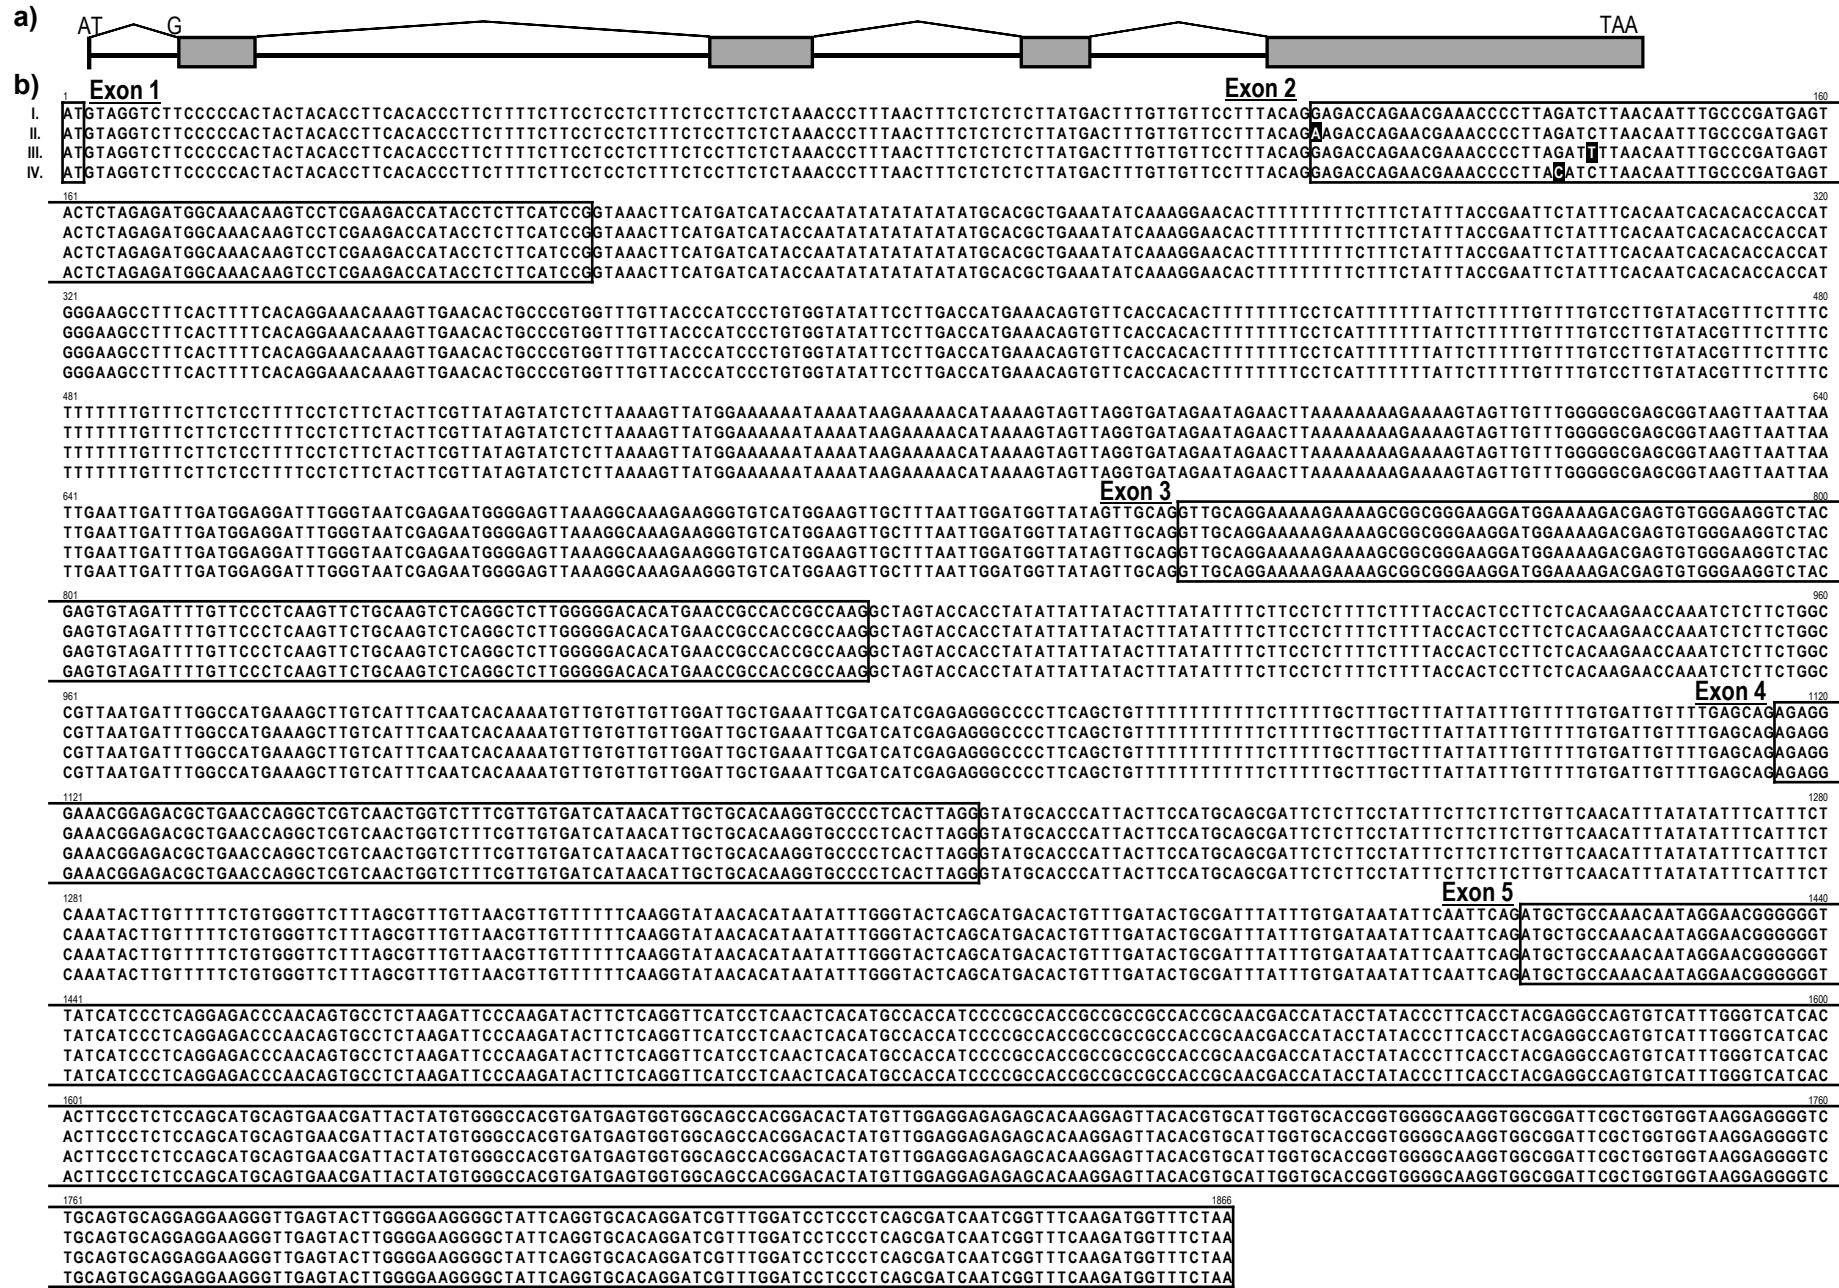

**Supplemental Fig. 1.** Schematic diagram (a) according to Fig. 1 and genomic sequences (b) of *Gm-JAG1* (*Glyma20g25000*) of the plant materials (Table 1) Boxes in (a) and (b) and inverted colored letters in (b) indicate exon regions and the nucleic acid differences from *Ln* genotype, respectively. Genotype; I. : *Ln* (EN, SC, FK, CL, HR), II. : 541m, III. : 685m, and IV. : *ln* (*SC<sub>ln</sub>*, *FK<sub>ln</sub>*, *CL<sub>ln</sub>*, *HR<sub>ln</sub>*).

1 EAR-motif 40

I. MRPERNP<sup>L</sup>DLNNLP<sup>D</sup>DEYSRDGKQVLEDHTSSSGCRKKKSG

III. MRPERNP<sup>L</sup>D<sup>F</sup>NNLP<sup>D</sup>DEYSRDGKQVLEDHTSSSGCRKKKSG

IV. MRPERNP<sup>L</sup><sup>H</sup>LNNLP<sup>D</sup>DEYSRDGKQVLEDHTSSSGCRKKKSG

41 80

GKDGKDECGKVYECR<sup>F</sup>CSLKFCKSQALGGHMNRHRQERET

GKDGKDECGKVYECR<sup>F</sup>CSLKFCKSQALGGHMNRHRQERET

GKDGKDECGKVYECR<sup>F</sup>CSLKFCKSQALGGHMNRHRQERET

81 120

ETLNQARQLVFRCDHNI<sup>A</sup>AAQGAPHLGCCQTI<sup>G</sup>TGGYHPSG

ETLNQARQLVFRCDHNI<sup>A</sup>AAQGAPHLGCCQTI<sup>G</sup>TGGYHPSG

ETLNQARQLVFRCDHNI<sup>A</sup>AAQGAPHLGCCQTI<sup>G</sup>TGGYHPSG

121 160

DPTVPLRFPRYFSGSSSTHMPPSPPPPPPPQRPYLYPSPT

DPTVPLRFPRYFSGSSSTHMPPSPPPPPPPQRPYLYPSPT

DPTVPLRFPRYFSGSSSTHMPPSPPPPPPPQRPYLYPSPT

161 200

RPVSFGSSHFPLQHAVNDYYVGHVMSGGSHGHYVGGESTR

RPVSFGSSHFPLQHAVNDYYVGHVMSGGSHGHYVGGESTR

RPVSFGSSHFPLQHAVNDYYVGHVMSGGSHGHYVGGESTR

201 240

SYTCIGAPVGQGGGFAGGKEGSAVQEEGLSTWGRGYSGAQ

SYTCIGAPVGQGGGFAGGKEGSAVQEEGLSTWGRGYSGAQ

SYTCIGAPVGQGGGFAGGKEGSAVQEEGLSTWGRGYSGAQ

241 256

DRLDPPSAI<sup>N</sup>RFDQGF

DRLDPPSAI<sup>N</sup>RFDQGF

DRLDPPSAI<sup>N</sup>RFDQGF

**Supplemental Fig. 2.** Deduced amino acid sequences of *Gm-JAG1* (*Glyma20g25000*) of the plant materials (Table 1) except for 541m (M1null)

Inverted colored letters indicate the nucleic acid differences from *Ln* genotype. Genotype; I. : *Ln* (EN, SC, FK, CL, HR), II. : 541m (null), III. : 685m, and IV. : *ln* (*SC\_ln*, *FK\_ln*, *CL\_ln*, *HR\_ln*).
